# Supplementary material
Source: publisher figshare collection journal article supplement (https://acs.figshare.com/ndownloader/files/3926527)
Supplement: Supplementary file 1 [file 3926527]

# Supporting Information

## “Light-on” Sensing of Antioxidants Using Gold Nanoclusters

*Lianzhe Hu, Lin Deng, Shahad Alsaiari, Dingyuan Zhang, and Niveen M. Khashab\**

Controlled Release and Delivery Lab, Advanced Membranes and Porous Materials  
Center, King Abdullah University of Science and Technology, Thuwal 23955-6900,  
Kingdom of Saudi Arabia.

### Contents

|                                                                                   |     |
|-----------------------------------------------------------------------------------|-----|
| 1. TEM of Au NCs.....                                                             | S-2 |
| 2. Fluorescence spectra of Au NCs.....                                            | S-3 |
| 3. Fluorescence response toward $\text{Fe}^{2+}$ and $\text{H}_2\text{O}_2$ ..... | S-4 |
| 4. UV-Vis spectra.....                                                            | S-5 |
| 5. Juices determination results.....                                              | S-6 |
| 6. Fluorescence response toward $\text{ClO}^-$ and AA.....                        | S-7 |
| 7. Cytotoxicity of Au NCs.....                                                    | S-8 |
| 8. Fluorescence outputs of logic gates.....                                       | S-9 |

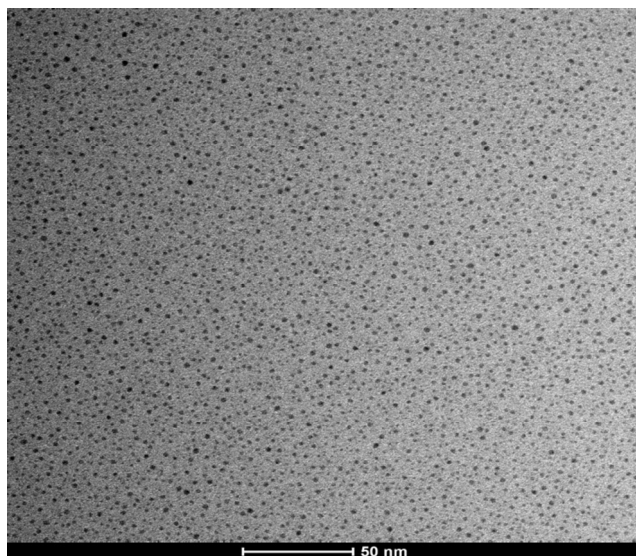

**Figure S1.** The TEM of as-prepared Au NCs.

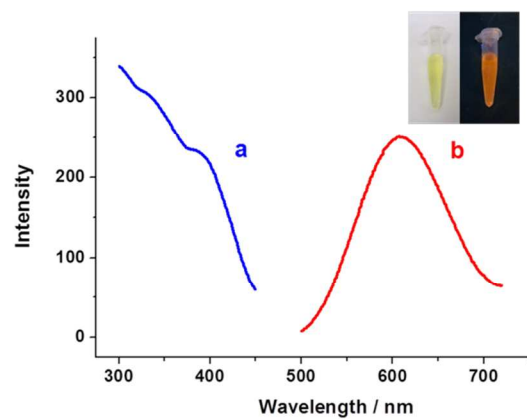

**Figure S2.** The fluorescence excitation (a) and emission (b) spectra of the obtained Au NCs. Inset: photographs of Au NCs under daylight (left) and 365 nm UV light (right).

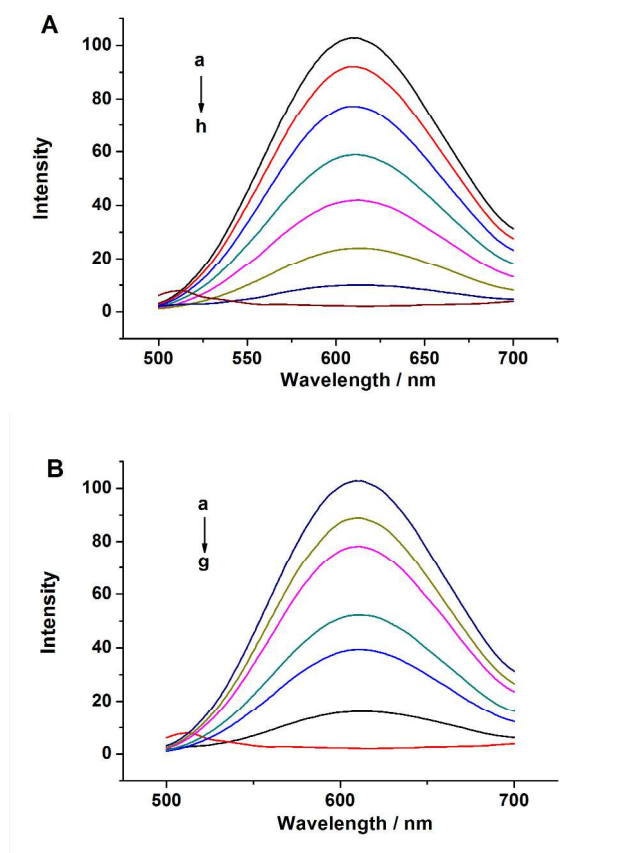

**Figure S3.** (A) The fluorescence intensity of 50  $\mu\text{g/mL}$  Au NCs and 50  $\mu\text{M}$   $\text{H}_2\text{O}_2$  in the presence of  $\text{Fe}^{2+}$  from 0, 1, 2, 3, 5, 10, 20, to 30  $\mu\text{M}$  (a $\rightarrow$ h). (B) The fluorescence intensity of 50  $\mu\text{g/mL}$  Au NCs and 50  $\mu\text{M}$   $\text{Fe}^{2+}$  in the presence of  $\text{H}_2\text{O}_2$  from 0, 0.5, 1, 2, 3, 10, to 20  $\mu\text{M}$  (a $\rightarrow$ g).

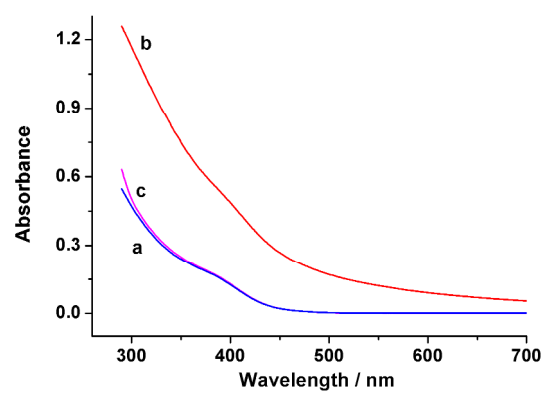

**Figure S4.** The UV-Vis spectra of (a) Au NCs only, (b) Au NCs in the presence of  $\bullet\text{OH}$ , (c) Au NCs in the presence of  $\bullet\text{OH}$  and AA.

Table S1. TAC values of fruit juices (expressed in AA) and AA recovery in the corresponding fruit juices (n=3).

| <b>Fruit juices</b> | <b>TAC<br/>(mM)</b> | <b>AA added<br/>(mM)</b> | <b>AA found<br/>(mM)</b> | <b>AA recovery<br/>(%)</b> |
|---------------------|---------------------|--------------------------|--------------------------|----------------------------|
| <b>Orange</b>       | 49.69               | 20                       | 68.53                    | 94.2                       |
| <b>Apple</b>        | 17.61               | 10                       | 26.74                    | 91.3                       |
| <b>Mango</b>        | 11.44               | 10                       | 20.92                    | 94.8                       |

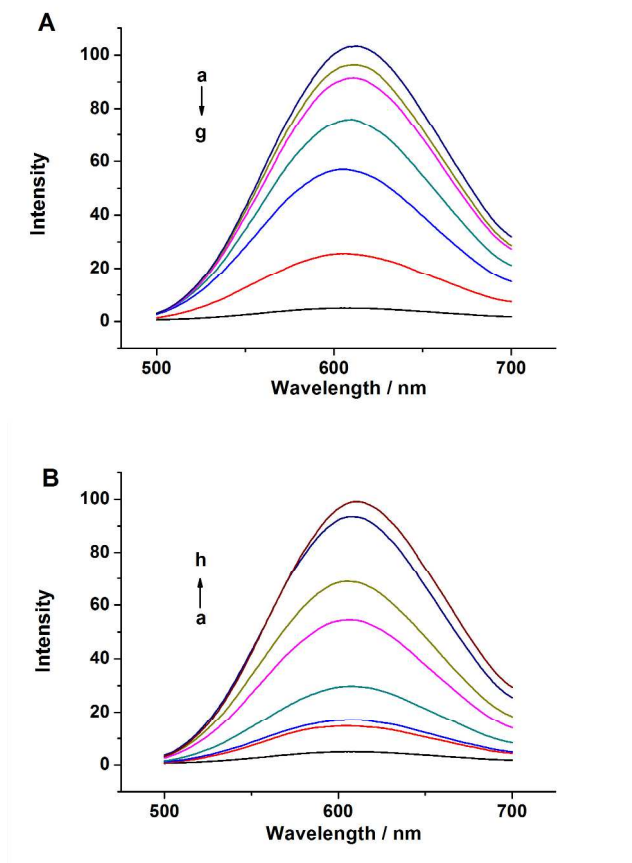

**Figure S5.** (A) The fluorescence intensity of 50  $\mu\text{g/mL}$  Au NCs in the presence of  $\text{ClO}^-$  from 0, 6, 10, 20, 100, 200, to 300  $\mu\text{M}$  (a $\rightarrow$ g). (B) The fluorescence intensity of 50  $\mu\text{g/mL}$  Au NCs and 300  $\mu\text{M}$   $\text{ClO}^-$  in the presence of AA from 0, 2, 5, 10, 30, 50, 100, to 150  $\mu\text{M}$  (a $\rightarrow$ h).

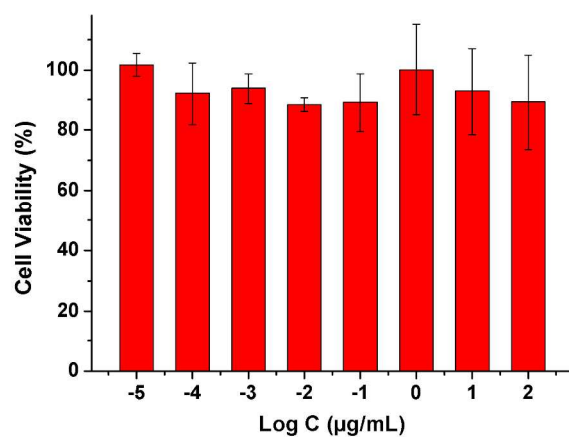

**Figure S6.** Cytotoxicity of different concentrations (0.01 ng/mL – 100 μg/mL) of Au NCs after incubation with HeLa cells for 24h.



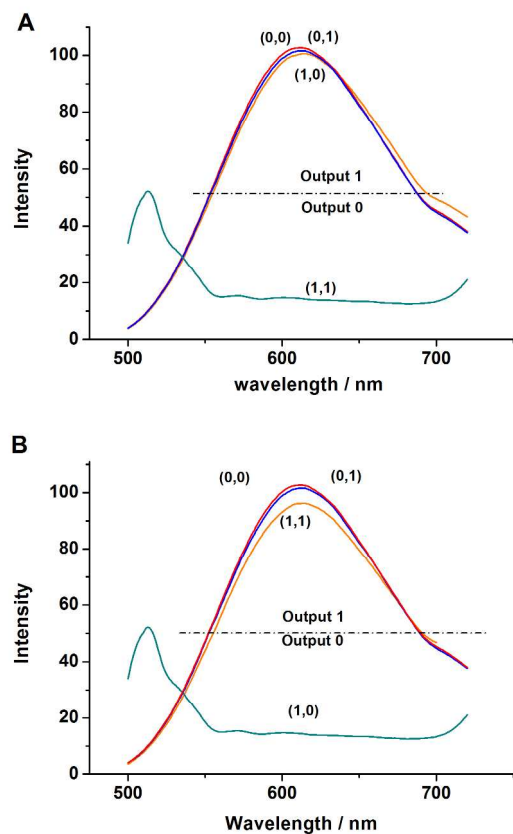

**Figure S7.** The fluorescence spectra of 50 µg/mL Au NCs in the presence of different inputs; (A) NAND logic gate with 50 µM  $\text{Fe}^{2+}$  and 50 µM  $\text{H}_2\text{O}_2$  as inputs; (B) IMPLICATION logic gate with  $\bullet\text{OH}$  (generated by 50 µM  $\text{Fe}^{2+}$  and 50 µM  $\text{H}_2\text{O}_2$ ) and 150 µM AA as inputs.
